# Supplementary material for: Contrasting the Co-variability of Daytime Cloud and Precipitation over Tropical Land and Ocean
Source: Copernicus journal article supplement (doi:10.5194/acp-2017-612), 2017-08-17
Supplement: Supplementary file 1 [file acp-2017-612-supplement.pdf]

# Supplementary Figures

RFO, Terra+Aqua, 2002.12-2015.11

(a)  $P5 > 0.0$  (RFO=4.6%)

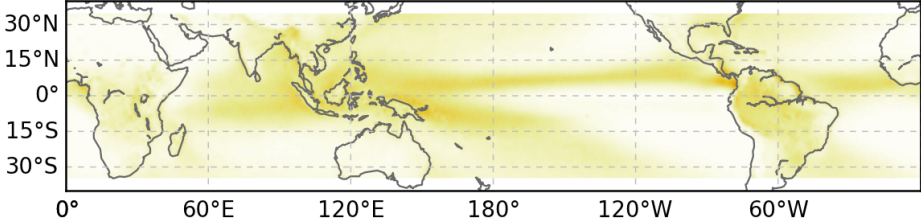

(b)  $P4 > 0.0$  (RFO=11.0%)

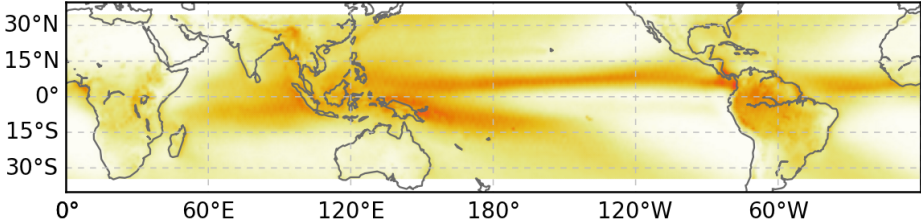

(c)  $P4 > 0.$  and  $P5 = 0.$  (RFO=6.7%)

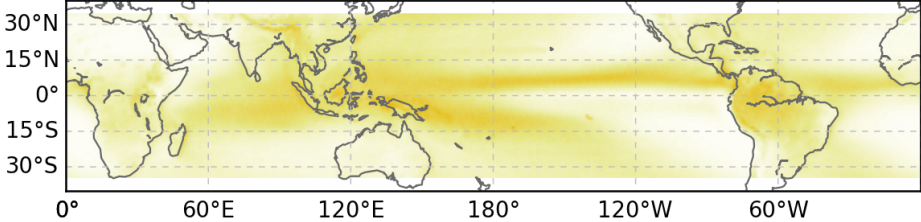

0% 15% 30% 45% 60% 75% 90%

Supplementary Figure 1: Map of relative frequency of occurrence (RFO) of the following conditions: (a)  $P5$  values greater than 0; (b)  $P4$  values greater than 0; and (c)  $P4$  greater than zero, but no  $P5$ .

Cld Type vs. P\_Histogram Corr. [35S-35N, T+A]

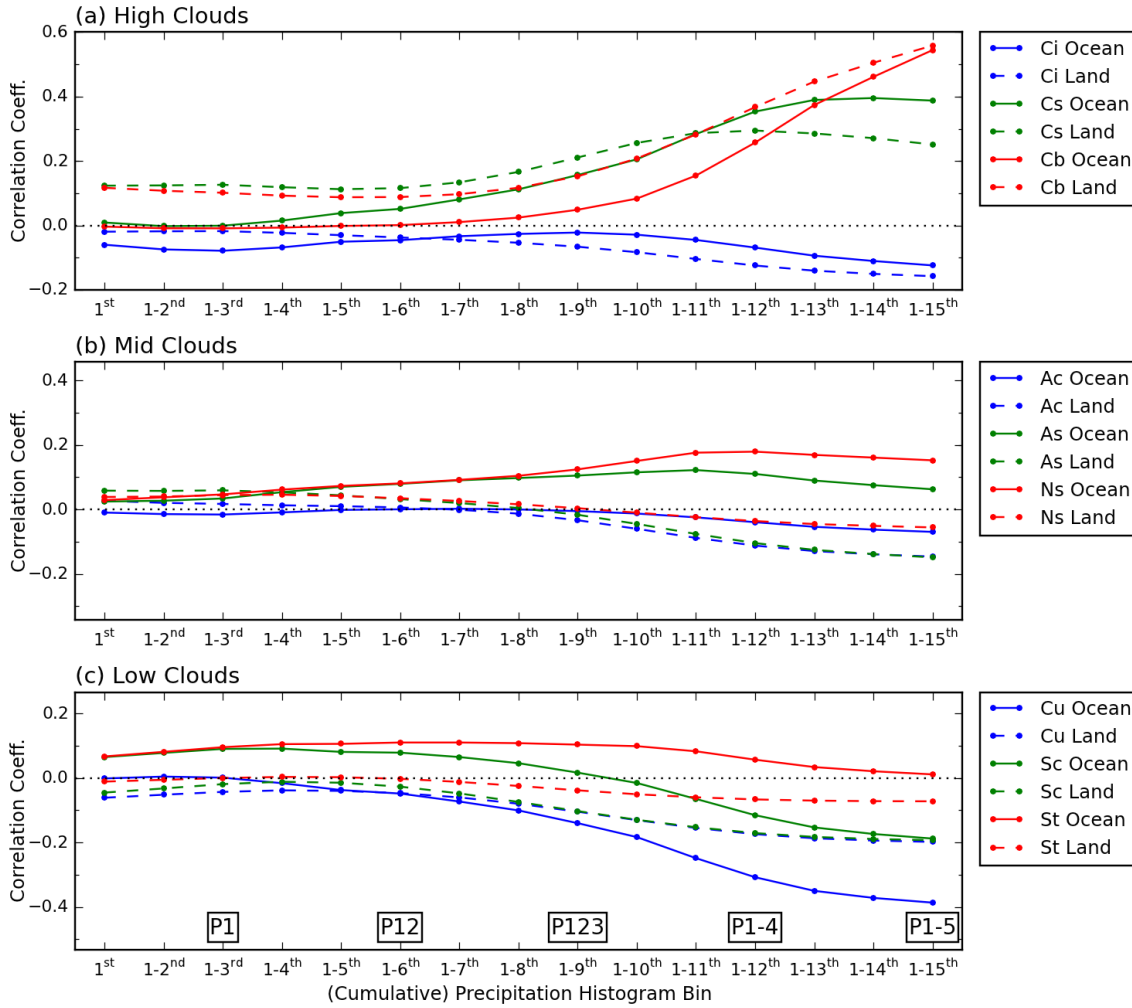

**Supplementary Figure 2:** Same as Fig. 11, but with the x-axis starting at the 1<sup>st</sup> bin and accumulating up to the heaviest 15th bin, which is equivalent to the sum from P1 to P5 or total rainy fraction.
